# Supplementary material for: Endophytic Communities of Transgenic Poplar Were Determined by the Environment and Niche Rather Than by Transgenic Events
Source: Front Microbiol. 2019 Mar 26;10:588. doi: 10.3389/fmicb.2019.00588 (PMC6445066; doi:10.3389/fmicb.2019.00588)
Supplement: Supplementary file 1 [file Table_1.xlsx]

## Sheet: Sheet1
Supplementary Table 1. Data of environmental factors.
	2018-06-09	15.7	23.1
	10	15.4	18.8
	11	9.7	24.2
	12	9.5	22.9
	13	13.2	22.8
	14	13.5	23.2
	15	13.2	26.4
	16	8	25.9
	17	7.5	24.7
	18	14.4	23
	19	16.1	19
	20	16.7	23.8
	21	12.2	23.1
	22	14.1	25.6
	23	13.3	25.4
	24	13.6	26.1
	25	12.5	25
	26	10.9	25
	27	9.2	24.3
	28	9.3	24.2
	29	8.7	25.9
	30	6.1	23.4
	31	4.9	22.7
	2018-07-01	3.1	20.9
	2018-07-02	4	22.6
	3	4.9	22.6
	4	6	23.2
	5	5.6	23.6
	6	5.5	22.1
	7	5.6	19.7
	8	5.5	21.4
	9	4.1	24.5
	10	11	23.2
	11	14.4	19.8
	12	11	24
	13	12.9	21.3
	14	14.3	22.3
	15	9.9	23.2
	16	9.5	22.6
	17	14.3	24.2
	18	10.9	23.6
	19	9.2	23.5
	20	8.4	22.4
	21	6.7	22.8
	22	6.8	23
	23	4.5	23.9
	24	3.6	25.4
	25	6	23.8
	26	6.2	25.6
	27	7.8	22.8
	28	10.6	24.9
	29	10.2	25.9
	30	14	21.9
	1	4.3	20
	2	2.1	20.8
	3	3.1	21.7
	4	9.7	26.7
	5	3.2	26.1
	6	7.9	23.9
	7	7.4	15.2
	8	3.9	21.6
	9	3.8	21.8
	10	8.6	19.8
	11	8.9	22.7
	12	4.6	21.6
	13	4.8	21.8
	14	3.3	22
	15	5.2	25.1
	16	12.7	22.7
	17	8.7	22.7
	18	8.1	26.6
	19	8.1	18.7
	20	8.6	21.2
	21	7.3	21.9
	22	1.7	21.1
	23	2	23.5
	24	0	25.8
	25	0.8	24.1
	26	-1	26.1
	27	0.3	24.3
	28	3.7	27.2
	29	0.5	25.5
	30	0.2	27.2
	31	4.7	26.9
	1	7.5	24.6
	2	3.2	22.3
	3	4.9	23.6
	4	8.7	22
	5	2.4	22.6
	6	2.6	24.2
	7	9.5	26.6
	8	2.9	22.3
	9	5.2	25.8
	10	-1	25.1
	11	2.7	30.4
	12	2.7	29.9
	13	1.5	27.1
	14	8.1	28
	15	4.3	28.9
	16	5.6	33.3
	17	8.2	32.3
	18	6.7	25.2
	19	7.7	19.4
	20	5.4	22.2
	21	2.3	22.8
	22	6.5	27.7
	23	8.6	26.7
	24	11.7	28.8
	25	8.8	22.9
	26	4.4	24.1
	27	6.1	24.8
	28	5.4	22.4
	29	0.3	23.4
	30	4.6	25.3
	31	3.5	24.6
	1	6.2	25.5
	2	8	28.1
	3	8.2	29.6
	4	10.7	31.4
	5	4.7	26.8
	6	4.1	26.1
	7	5.4	26.2
	8	4.4	25.8
	9	7.1	26.6
	10	6.6	25.9
	11	6.9	29.3
	12	8.8	31.8
	13	9.9	33.5
	14	16.8	22.8
	15	7.1	26

## Sheet: Sheet2
					2017-05-09	15.7	23.1			Minimum temp	Maximum temp	Average temp
					10	15.4	18.8		1	12.8857	23.0571	17.9714
					11	9.7	24.2		2	12.7143	23.5857	18.15
					12	9.5	22.9		3	11.0714	25.1286	18.1
					13	13.2	22.8		4	4.94286	22.7143	13.8286
					14	13.5	23.2	Treatment started	5	8.15714	22.1	15.1286
					15	13.2	26.4		6	11.5714	22.9571	17.2643
						12.8857	23.0571		7	6.02857	23.8429	14.9357
					16	8	25.9		8	7.44286	22.5714	15.0071
					17	7.5	24.7	F	9	6.35714	22.1571	14.2571
					18	14.4	23		10	6.88571	22.6571	14.7714
					19	16.1	19		11	5.11429	22.6857	13.9
					20	16.7	23.8		12	1.31429	25.9	13.6071
					21	12.2	23.1	F finished	13	5.54286	23.7	14.6214
					22	14.1	25.6		14	3.15714	26.9429	15.05
						12.7143	23.5857		15	5.74286	26.3	16.0214
					23	13.3	25.4		16	7.35714	25.3429	16.35
					24	13.6	26.1		17	5.92857	26.8429	16.3857
					25	12.5	25		18	5.6	26.6714	16.1357
					26	10.9	25
					27	9.2	24.3
					28	9.3	24.2
					29	8.7	25.9
						11.0714	25.1286
					30	6.1	23.4
					31	4.9	22.7
					2018-06-01	3.1	20.9
					1900-06-02	4	22.6
					3	4.9	22.6
					4	6	23.2
					5	5.6	23.6
						4.94286	22.7143
					6	5.5	22.1
					7	5.6	19.7
					8	5.5	21.4
					9	4.1	24.5
					10	11	23.2
					11	14.4	19.8
					12	11	24
						8.15714	22.1
					13	12.9	21.3
					14	14.3	22.3
					15	9.9	23.2
					16	9.5	22.6
					17	14.3	24.2
					18	10.9	23.6
					19	9.2	23.5
						11.5714	22.9571
					20	8.4	22.4
					21	6.7	22.8
					22	6.8	23
					23	4.5	23.9
					24	3.6	25.4
					25	6	23.8
					26	6.2	25.6
						6.02857	23.8429
					27	7.8	22.8
					28	10.6	24.9
					29	10.2	25.9
					30	14	21.9
					2018-07-01	4.3	20
					2	2.1	20.8
					3	3.1	21.7
						7.44286	22.5714
					4	9.7	26.7
					5	3.2	26.1
					6	7.9	23.9
					7	7.4	15.2
					8	3.9	21.6
					9	3.8	21.8
					10	8.6	19.8
						6.35714	22.1571
					11	8.9	22.7
					12	4.6	21.6
					13	4.8	21.8
					14	3.3	22
					15	5.2	25.1
					16	12.7	22.7
					17	8.7	22.7
						6.88571	22.6571
					18	8.1	26.6
					19	8.1	18.7
					20	8.6	21.2
					21	7.3	21.9
					22	1.7	21.1
					23	2	23.5
					24	0	25.8
						5.11429	22.6857			5.11429	22.6857
					25	0.8	24.1			1.31429	25.9
					26	-1	26.1			5.54286	23.7
					27	0.3	24.3			3.15714	26.9429
					28	3.7	27.2			5.74286	26.3
					29	0.5	25.5			7.35714	25.3429
					30	0.2	27.2			5.92857	26.8429
					31	4.7	26.9			5.6	26.6714
						1.31429	25.9
					2017-08-01	7.5	24.6
					2	3.2	22.3
					3	4.9	23.6
					4	8.7	22
					5	2.4	22.6
					6	2.6	24.2
					7	9.5	26.6
						5.54286	23.7
					8	2.9	22.3
					9	5.2	25.8
					10	-1	25.1
					11	2.7	30.4
					12	2.7	29.9
					13	1.5	27.1
					14	8.1	28
						3.15714	26.9429
					15	4.3	28.9
					16	5.6	33.3
					17	8.2	32.3
					18	6.7	25.2
					19	7.7	19.4
					20	5.4	22.2
					21	2.3	22.8
						5.74286	26.3
					22	6.5	27.7
					23	8.6	26.7
					24	11.7	28.8
					25	8.8	22.9
					26	4.4	24.1
					27	6.1	24.8
					28	5.4	22.4
						7.35714	25.3429
					29	0.3	23.4
					30	4.6	25.3
					31	3.5	24.6
	12	8.8	31.8		2018-09-01	6.2	25.5
	13	9.9	33.5		2	8	28.1
	14	16.8	22.8		3	8.2	29.6
	15	7.1	26		4	10.7	31.4
						5.92857	26.8429
					5	4.7	26.8
					6	4.1	26.1
					7	5.4	26.2
					8	4.4	25.8
					9	7.1	26.6
					10	6.6	25.9
					11	6.9	29.3
						5.6	26.6714
