# Supplementary material for: Endophytic Communities of Transgenic Poplar Were Determined by the Environment and Niche Rather Than by Transgenic Events
Source: Front Microbiol. 2019 Mar 26;10:588. doi: 10.3389/fmicb.2019.00588 (PMC6445066; doi:10.3389/fmicb.2019.00588)
Supplement: Supplementary file 2 [file Table_2.xlsx]

## Sheet: Sheet1
Supplementary Table 2. Relative abundances of bacteria in phylum level.
	DAR		DBR		QAR		QBR		DAS		DBS		QAS		QBS		Plant Compartment effect	Genetic Modification effect	Plant Location effect
Phylum	Reads ± SE	%	Reads ± SE	%	Reads ± SE	%	Reads ± SE	%	Reads ± SE	%	Reads ± SE	%	Reads ± SE	%	Reads ± SE	%	p	p	p
actinobacteria	15815.33±4459.92	48.1456	19350.00±806.95	58.9059	20653.00±2302.50	62.8725	18335.33±1236.97	55.817	17497.33±1366.51	53.266	17429.67±2136.52	53.06	14082.00±2129.41	42.8689	16442.67±783.15	50.0553	0.177	0.578	0.927
proteobacteria	15952.33±3751.16	48.5626	12047.33±455.65	36.6749	10480.33±1795.51	31.9046	12139.00±1137.64	36.9539	10603.67±1701.95	32.28	8968.33±755.57	27.3017	10357.00±424.46	31.5291	10346.33±400.97	31.4966	0.046*	0.432	0.392
bacteroidetes	859.00±811.57	2.615	338.33±113.81	1.02997	427.67±157.09	1.30192	659.33±235.02	2.00716	2484.33±367.54	7.56289	2793.67±1298.11	8.50457	4326.67±1665.86	13.1714	2328.33±581.17	7.08799	<0.001**	0.402	0.59
firmicutes	159.67±71.10	0.486062	1039.00±316.55	3.16296	278.33±62.14	0.847311	751.33±270.39	2.28723	1446.67±250.11	4.40399	2550.67±1630.59	7.76482	3524.67±558.72	10.7299	2995.67±748.53	9.11951	<0.001**	0.328	0.235
acidobacteria	2.33±1.86	0.00710321	11.67±3.18	0.035516	740.33±295.30	2.25375	549.67±126.12	1.67331	487.67±92.29	1.48457	506.00±162.93	1.54038	247.67±128.75	0.753955	365.67±109.01	1.11317	0.574	0.933	0.106
chloroflexi	0.67±0.67	0.00202949	4.67±2.03	0.0142064	12.33±7.22	0.0375455	23.67±15.67	0.0720468	134.67±86.48	0.409957	130.67±82.41	0.39778	133.33±106.57	0.405898	77.33±48.86	0.235421	0.01**	0.774	0.877
gemmatimonadetes	0	0	4.00±3.51	0.0121769	6.00±2.00	0.0182654	48.67±37.32	0.148153	70.33±53.36	0.214111	164.67±133.49	0.501284	56.33±3.93	0.171492	137.33±101.30	0.418075	0.037*	0.194	0.956
fusobacteria	13.33±11.39	0.0405898	12.00±4.04	0.0365308	100.00±36.02	0.304423	119.67±35.35	0.364293	2.33±2.33	0.00710321	16.00±16.00	0.0487077	40.33±22.56	0.122784	45.00±22.50	0.13699	0.038*	0.57	0.001**
armatimonadetes	0	0	0	0	65.67±26.82	0.199905	73.33±23.45	0.223244	12.33±12.33	0.0375455	0	0	0	0	0	0	0.016*	0.924	0.016*
nitrospirae	0	0	0.67±0.33	0.00202949	0	0	21.00±11.36	0.0639289	22.33±22.33	0.0679879	56.67±56.67	0.172507	25.33±13.69	0.0771206	18.67±18.17	0.0568257	0.118	0.436	0.816
TM6__Dependentiae	16.00±16.00	0.0487077	4.00±2.31	0.0121769	49.67±34.11	0.151197	10.67±10.67	0.0324718	0	0	42.00±42.00	0.127858	0	0	0	0	0.534	0.883	0.978
verrucomicrobia	4.67±2.40	0.0142064	8.33±3.76	0.0253686	3.00±3.00	0.0091327	4.00±4.00	0.0121769	0	0	49.33±49.33	0.150182	0	0	45.33±22.85	0.138005	0.174	0.076	0.852
tenericutes	0	0	0	0	13.00±13.00	0.039575	0	0	0	0	84.00±58.69	0.255716	0	0	0	0	0.305	0.305	0.305
spirochaetae	0	0	0	0	0	0	0	0	23.00±14.57	0.0700174	0	0	43.00±35.02	0.130902	0	0	0.096	0.096	0.603
fibrobacteres	0	0	0	0	0.33±0.33	0.00101474	54.33±54.33	0.165403	0	0	0	0	0	0	0	0	0.326	0.332	0.326
planctomycetes	1.33±1.33	0.00405898	9.67±5.04	0.0294276	0	0	6.00±6.00	0.0182654	18.33±18.33	0.0558109	0	0	0	0	17.33±17.33	0.0527667	0.489	0.62	0.823
chlamydiae	18.33±9.28	0.0558109	11.33±4.26	0.0345013	3.00±3.00	0.0091327	10.00±5.03	0.0304423	0	0	8.67±8.67	0.0263834	0	0	0	0	0.028*	0.552	0.092
saccharibacteria	5.00±5.00	0.0152212	4.67±4.67	0.0142064	8.67±5.55	0.0263834	3.33±3.33	0.0101474	22.00±22.00	0.0669731	0	0	0	0	0	0	0.989	0.253	0.412
FBP	1.00±0.58	0.00304423	1.67±1.67	0.00507372	2.00±2.00	0.00608847	15.67±15.67	0.047693	17.67±17.67	0.0537814	0	0	0	0	0	0	0.915	0.894	0.915
elusimicrobia	0	0	0	0	1.67±1.67	0.00507372	5.00±5.00	0.0152212	0	0	24.00±24.00	0.0730616	0	0	0	0	0.491	0.282	0.491
tectomicrobia	0	0	0.33±0.33	0.00101474	0	0	0.00±0.00	0	0	0	0	0	0	0	26.67±26.67	0.0811795	0.335	0.323	0.335
deinococcus-Thermus	0	0	0	0	2.67±2.67	0.00811795	5.67±5.67	0.0172507	0.67±0.67	0.00202949	8.00±1.00	0.0243539	6.67±5.70	0.0202949	1.33±1.33	0.00405898	0.365	0.585	0.404
cyanobacteria	0	0	0	0	1.33±0.67	0.00405898	12.33±11.84	0.0375455	1.00±0.58	0.00304423	2.33±1.20	0.00710321	0.33±0.33	0.00101474	1.00±0.58	0.00304423	0.46	0.289	0.34
latescibacteria	0	0	0	0	0	0	0	0	0	0	14.33±14.33	0.043634	0	0	0	0	0.329	0.329	0.329
omnitrophica	0	0	0	0	0	0	0	0	0	0	0	0	5.67±5.67	0.0172507	0.33±0.33	0.00101474	0.3	0.356	0.3
deferribacteres	0	0	0	0	0	0	1.00±1.00	0.00304423	4.67±4.67	0.0142064	0	0	0	0	0	0	0.46	0.46	0.46
chlorobi	0	0	1.33±1.33	0.00405898	0	0	0	0	0	0	0	0	0	0	0	0	0.329	0.329	0.329
Values represent average number of reads (± standard error) and relative read abundances (%) of three biologically independent poplars after normalization to the minimum sample sequence number at phylum level. Normal distributions and homoscedasticity of variances of the data were checked with the Kolmogorov-Smirnov test and was analysed using either Bartlett’s test. Significant differences in th…
